# Supplementary material for: Cooling Effect of Green Space and Water on Urban Heat Island and the Perception of Residents: A Case Study of Xi’an City
Source: MDPI journal article supplement (doi:10.3390/ijerph192214880), 2022-11-12
Supplement: s1 [file s1]

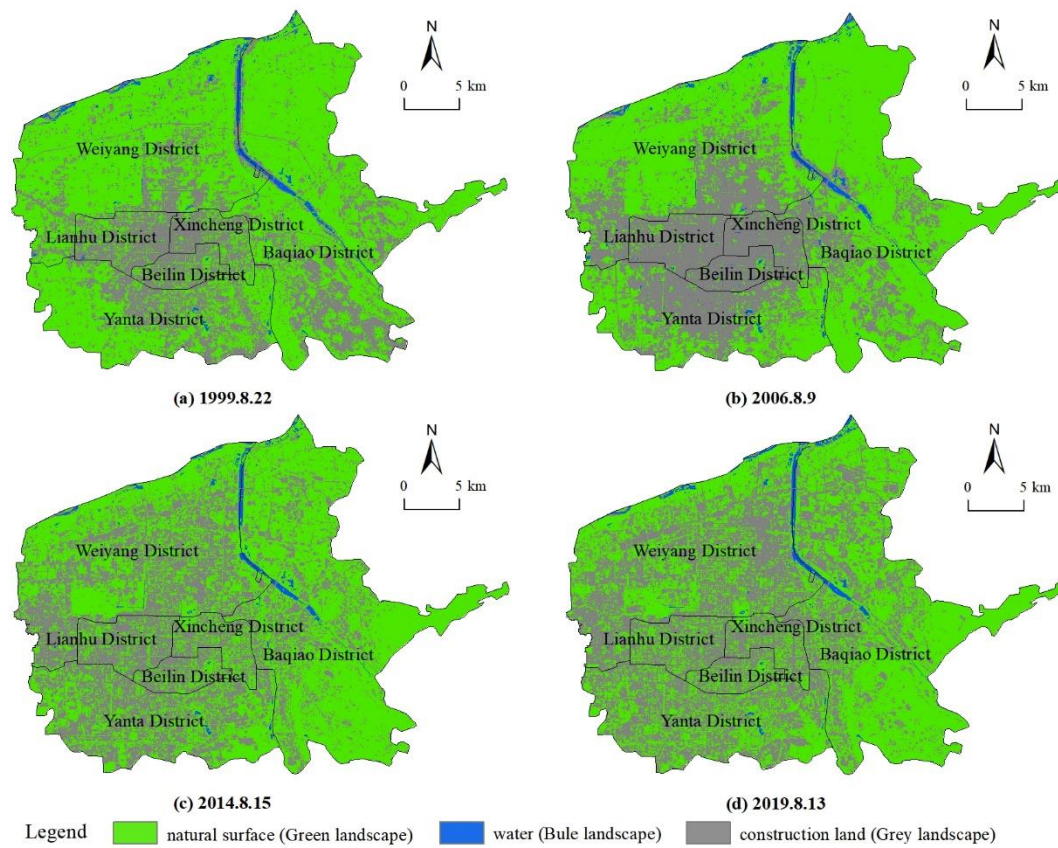

**Figure S1.** Landscape types over four years in the study area.

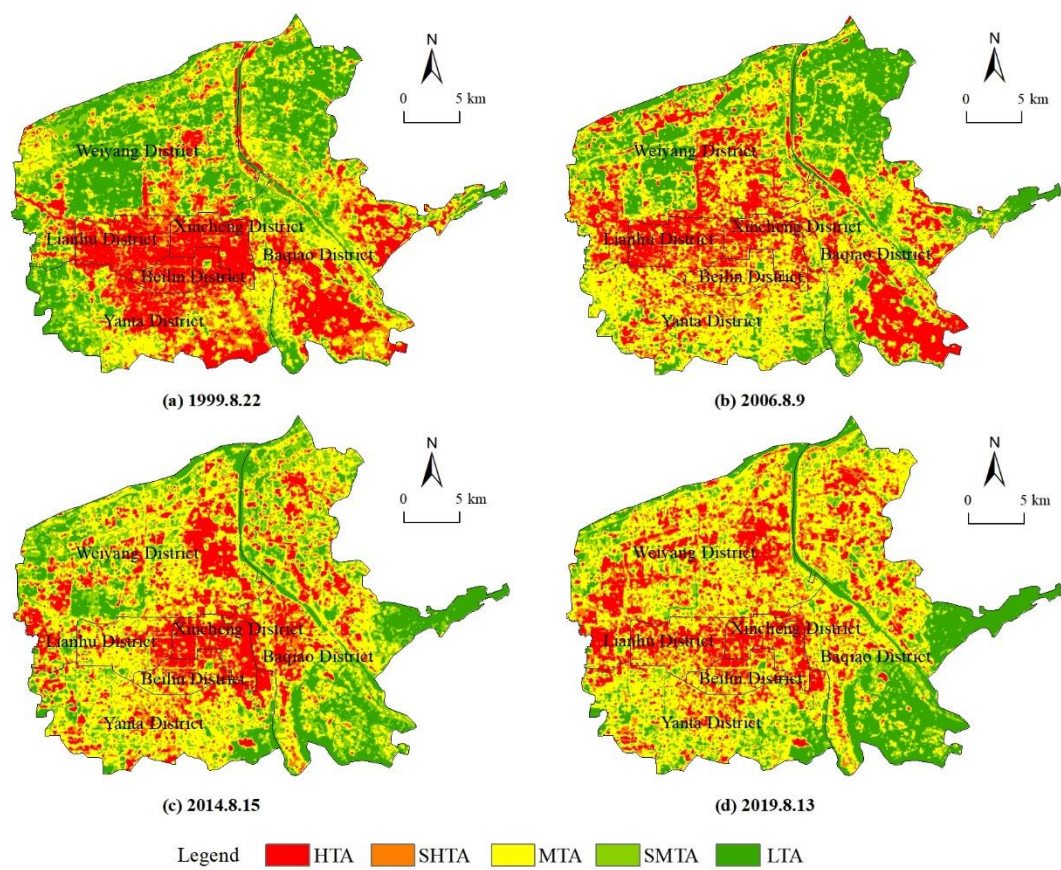

**Figure S2.** Spatial distribution of LST grades over four periods in central Xi'an.

**Table S1.** Area and proportion of landscape types over four years in the study area.

| Year | Green landscape      |              | Blue landscape       |              | Grey landscape       |              |
|------|----------------------|--------------|----------------------|--------------|----------------------|--------------|
|      | Area/km <sup>2</sup> | Proportion/% | Area/km <sup>2</sup> | Proportion/% | Area/km <sup>2</sup> | Proportion/% |
| 1999 | 576.45               | 68.26        | 8.63                 | 1.02         | 259.43               | 30.72        |
| 2006 | 516.75               | 61.19        | 8.73                 | 1.03         | 319.03               | 37.78        |
| 2014 | 512.30               | 60.66        | 11.02                | 1.31         | 321.17               | 38.03        |
| 2019 | 465.68               | 55.14        | 12.38                | 1.47         | 366.44               | 43.39        |

## Supplementary S2. Questionnaire of urban residents' perceptions of high temperature and the cooling effect of ecological landscape

Dear Residents:

Hello! We are students from School of Geography and Tourism, Shaanxi Normal University. We are studying on the cooling effect of the ecological landscape on urban heat island in the central area of Xi'an City, we look forward to provide suggestions for the prevention of thermal environmental risks in Xi'an City through our study. Your answer will provide a valuable data basis for our study. Sincerely thanks for your cooperation and support.

### Instructions:

1. The survey is anonymous, and all the data would be strictly confidential and only used for research, which would not cause any inconvenience to you;
2. Please read the questions and options carefully, choose the answer that best matches your actual situation, please check the options or fill in directly;
3. Only one answer should be selected for all the questions in the questionnaire, except for the questions marked with "multiple choice".

Date: \_\_\_\_\_ Year \_\_\_\_\_ Month \_\_\_\_\_ Day      Name of investigator: \_\_\_\_\_  
Investigation site: \_\_\_\_\_ District \_\_\_\_\_ Street (town) \_\_\_\_\_ Community (village) \_\_\_\_\_

### Part 1: Basic Information

|                                    |                                                                                                                                                                                   |
|------------------------------------|-----------------------------------------------------------------------------------------------------------------------------------------------------------------------------------|
| <b>A1. Gender</b>                  | 1. Male      2. Female                                                                                                                                                            |
| <b>A2. Age</b>                     |                                                                                                                                                                                   |
| <b>A3. Physical condition</b>      | 1.Healthy   2. Well   3. General   4. Have disease: _____                                                                                                                         |
| <b>A4. Education</b>               | 1.Junior high school and below      2.High school (secondary specialized school or vocational-technical college)<br>3.Junior college   4.Undergraduate   5.Postgraduate and above |
| <b>A5. Occupation</b>              | 1.Public institutions      2.Company employee<br>3.Service industry      4.Student   5.Outdoor worker   6.Retiree<br>7.Individual business      8.Unemployed   9.Others: _____    |
| <b>A6. Monthly income</b>          | 1.Under 2000 CNY   2.2000~4000 CNY   3.4000~6000 CNY<br>4.6000~8000 CNY   5.Over 8000 CNY                                                                                         |
| <b>A7. Residence time in Xi'an</b> | 1.Local people      2. Within six months<br>3. Six months to two years      4.Three to five years<br>5. Five to ten years      6.More than ten years                              |

### Part 2: Daily life

#### B1. What is your housing type?

- 1.Non-top floor of apartment building      2.Top floor of apartment building      3.Flat building  
4.Villa      5.Others: \_\_\_\_\_

#### B2. What kind of cooling equipment do you have in your home (multiple choices)?

- 1.Fan      2. Air conditioner      3. Refrigerator      4. None

**B3. Which of the following environments do you mostly work in?**

1. Outside in the sun                      2. Outdoor shade  
3. Indoor without air conditioner      4. Indoor with air conditioner

**B4. During hot weather, what cooling equipment do you use at work (multiple choices)?**

1. Fan                      2. Air conditioner                      3. Refrigerator                      4. None

**B5. How long do you normally need to work outside in a day (single choice)?**

1. Within 1 hour    2. 1~2 hours    3. 2~4 hours    4. 4~6 hours    5. 6~8 hours    6. More than 8 hours

**B6. How do you usually go to work or go out during the summer (multiple choice)?**

1. Walk            2. Bicycle/Electric bicycle            3. Bus            4. Subway  
5. Private car            6. Taxi            7. Others: \_\_\_\_\_

**Part 3: Perception of high temperature weathers**

**C1. What degree do you think is the high temperature weather? Above \_\_\_\_\_ °C**

**C2. How long do you think the hot weather in Xi'an usually lasts?**

During \_\_\_\_\_ (Month) to \_\_\_\_\_ (Month)

**C3. How do you feel the high temperature weathers affects your daily life?**

1. Great            2. Large            3. General            4. Minor            5. Barely

**C4. What kind of impact will high temperature weathers bring to you (multiple choice)?**

1. Affect mood (psychological irritability, anxiety)            2. Travel inconvenience  
3. Decrease in travel activities            4. Cost of living increases            5. Decrease in study/work efficiency  
6. Cause physical discomfort            7. No influence

**C5. Have you ever gone to the hospital for medical treatment due to high temperature weathers (multiple choices)?**

1. Respiratory discomfort    2. Sleep disorders    3. Cardiovascular and cerebrovascular complications  
4. Digestive system diseases    5. Sunburn            6. Sunstroke            7. Others: \_\_\_\_\_            8. None

**Part 4: Perception of the cooling effect of green space and water**

**D1. Scores for the cooling effect (On a scale of 0 to 5, 0 means no feeling, 5 means obvious feeling)?**

| Year                                       | 1999 | 2006 | 2014 | 2019 |
|--------------------------------------------|------|------|------|------|
| Cooling effect of surrounding green spaces |      |      |      |      |
| Cooling effect of surrounding water area   |      |      |      |      |

**D2. In recent years, do you think the cooling effect of ecological landscape is gradually improved with the construction of green space and water in Xi'an City?**

1. The cooling effect is getting better            2. Not sure            3. The cooling effect is getting worse

**D3. Do you think the area of water or green space will have an impact on its cooling effect?**

1. Yes                      2. No                      3. Not sure

**D4. Do you think the shape of water or green space will have an impact on its cooling effect? (If not, skip question D5)**

1. Yes                      2. No                      3. Not sure

**D5. Which shape of water or green space do you think has the best cooling effect? (A score of 0 is the worst and a score of 5 is the best)**

Water or greenspace landscape in a shape of roundness: \_\_\_\_\_ score

Water or greenspace landscape in a shape of rectangle: \_\_\_\_\_ score

Water or greenspace landscape in a shape of foursquare: \_\_\_\_\_score

Water or greenspace landscape in irregular shape: \_\_\_\_\_score

**D6. Compared with greenspace and water, which one do you think has a better cooling effect?**

1. Water landscape                      2. Greenspace                      3. Not sure

## **Part 5: Personal needs and suggestions**

**E1. What policies and measures do you want the government to take to deal with high temperature weathers (multiple choices)?**

1. Guarantee water supply and power supply in hot weather    2. Provide high temperature subsidies to needy families    3. Provide heatstroke prevention medicines    4. Increase open spaces with air conditioner    5. Increase green infrastructure    6. Replenish border trees    7. Announce high temperature warnings in time    8. Adjust summer working hours    9. Others:\_\_\_\_\_

**E2. Facing the high temperature weathers, do you think it is necessary to build urban greenspace and water landscape?**

1. Very necessary    2. Necessary    3. General    4. Not quite necessary    5. No need at all

**E3. Do you have any suggestions for the construction of water and greenspaces around your living and working environment?**

---

---

---
